# Supplementary material
Source: publisher site journal article supplement (https://www.dovepress.com/article/332972)
Supplement: Supplementary file 1 [file get_supplementary_file.php]

## (Supplementary File) Semi-Structured interview guide

I am going to start first by quickly asking some questions about your perceptions on referral practices.

#### Aim 1: Reasons or perceived value of MDM attendance

1. Health professionals are busy, and MDT meetings can be time-consuming. What are some of the reasons why you attend MDT meetings?
   1. Prompt if needed: What is the value to MDT meeting attendance to you personally?
2. There is limited research on MDMs, particularly on why MDMs may make a difference to patient outcomes. Do you believe that MDMs make a difference to patients? How so?
   1. Prompt: Could you describe what the ‘active ingredient’ in MDMs may be?
3. Do you think there is any patient risk associated with being presented at an MDT meeting?
4. There may not always be consensus on which treatment plan is more appropriate for a particular patient. What is the process if consensus is not reached?

## *Aim 2: Referral practices*

[Please note participants’ EOI response regarding referral practices – if *No* or *Unsure*, proceed to Q8, only individuals who refer receive Q5-7]

For this part of the interview I will be asking you questions pertaining to your personal referral practices to MDMs. I will also be asking you the referral practices you see in your MDT, and what guidelines or recommendations are in place to assist with referring to an MDM.

1. Could you please describe how you would refer a patient to the MDT? (e.g. do you use a referral form, do you contact the MDT co-ordinator etc.)
2. Could you please talk me through how you would decide which patient would benefit from MDT review?
   1. Does your decision process differ to your colleagues – and if so, how do you think it differs?
   2. Is there any specific patient characteristics that you think would always warrant MDM review?
3. Do you mention MDT meetings to patients – how do you introduce or ask patients about presentation?
4. Is there a process for documenting patient consent to be presented at an MDT meeting?
5. Do you think there are some patients that should not be referred for MDM review?
   1. Prompt: Are there any specific types of patients that are routinely presented at your MDT that you think should not be?
6. Does your MDT have any recommendations or guidelines regarding which patients should be referred for discussion in an MDM? (for example – all new cases should be discussed, patients with StageX)
   1. If yes, could you please quickly summarise these guideline and which patients they might apply to?

[Please note participants’ EOI response regarding referral practices – if *No* or *Unsure*, proceed to Q10c]

- 1. (ONLY FOR REFERRING CLINICIANS) If yes, to what degree do you think these guidelines/recommendations guide your decision to refer a patient?
  2. If yes, to what degree do you think these guidelines/recommendations guide other colleagues’ decision to refer a patient?
  3. If yes, what are your thoughts on how these guidelines or recommendations influence patient outcomes?
     1. If yes, what is the benefit or disadvantage of these guidelines or recommendations?
     2. If yes, is there any other factors you feel this guideline or recommendation does not cover?

## Questions regarding proportion of discussed cases

1. What are your thoughts on the idea that all new cases of cancer should be discussed at a tumour-specific MDM?
2. Some research has proposed the idea of a two-tiered approach to MDT referrals, whereby all new cases are referred for discussion but only those with specific criteria or complexity are discussed in greater depth. What are your thoughts on this?
3. Do you have any further comments to add regarding referral practices and referral criteria into MDMs?
4. What proportion of discussed cases do you think the MDT recommendation is followed?

## Questions regarding organisation structure

1. Is there an existing terms of reference for your MDT?

[If *No*, proceed to Q17]

1. If terms of reference exist–
   1. Do you think the TOR is comprehensive or would you like something added?
   2. Have you used these TORs in the past?
   3. Could the TOR be improved; if so, how?
   4. Would you refer a new colleague to review the TOR?

## Questions regarding the chair and team quality

1. Could you please describe what factors make an ideal MDM chair?

[Please note participants’ EOI response regarding type of MDTs they attend – if only one, proceed to Q19]

1. If the participant attends multiple tumour boards- are there any particular factors that make one MDM function more effectively relative to another?
